# Supplementary material for: Spatial preferences of microRNA targets in 3' untranslated regions
Source: PubMed Central journal article supplement (PMC1904200; doi:10.1186/1471-2164-8-152), 2007-06-07
Supplement: 1471-2164-8-152-S1.pdf [file 1471-2164-8-152-S1.pdf]

Supplementary Table 1: Biological process (first section), molecular function (second section), cellular component (third section) from the Gene Ontology. Significance was set at the 0.05 level; an asterisk indicates significance after applying Bonferroni correction for multiple comparisons. Observed counts / expected counts are shown at the bottom of each cell. Blank cells indicate non-significance even before Bonferroni correction.

| Targeted genes                  | Diff. targ. genes             | Non-diff. targ. genes           | On/off genes                  | Modulating genes             | Name                                            |
|---------------------------------|-------------------------------|---------------------------------|-------------------------------|------------------------------|-------------------------------------------------|
| * $7 \times 10^{-6}$<br>520/446 | $2 \times 10^{-3}$<br>232/195 | $9 \times 10^{-3}$<br>288/254   | $4 \times 10^{-2}$<br>122/105 | $2 \times 10^{-2}$<br>110/90 | Regulation of cellular process                  |
| * $7 \times 10^{-5}$<br>63/42   |                               | $3 \times 10^{-3}$<br>48/33     |                               | $2 \times 10^{-2}$<br>15/8   | Cell differentiation                            |
| * $9 \times 10^{-5}$<br>136/104 | $6 \times 10^{-3}$<br>62/45   | $2 \times 10^{-2}$<br>74/59     | $2 \times 10^{-2}$<br>35/24   |                              | Negative regulation of biological process       |
| * $3 \times 10^{-4}$<br>387/336 |                               | * $3 \times 10^{-4}$<br>258/213 |                               |                              | Cell communication                              |
| * $4 \times 10^{-4}$<br>482/427 | $2 \times 10^{-2}$<br>213/187 | $3 \times 10^{-2}$<br>269/243   |                               | $2 \times 10^{-2}$<br>104/86 | Regulation of physiological process             |
| * $4 \times 10^{-4}$<br>55/37   |                               | $2 \times 10^{-3}$<br>51/35     |                               |                              | System development                              |
| $5 \times 10^{-3}$<br>68/52     |                               |                                 |                               |                              | Vesicle-mediated transport                      |
| $6 \times 10^{-3}$<br>14/8      |                               |                                 |                               |                              | Cell migration                                  |
| $8 \times 10^{-3}$<br>48/35     | $3 \times 10^{-2}$<br>23/16   |                                 |                               |                              | Organ development                               |
| $2 \times 10^{-2}$<br>9/5       |                               |                                 |                               |                              | Cell growth                                     |
|                                 | $3 \times 10^{-3}$<br>15/7    |                                 |                               |                              | Locomotion                                      |
|                                 |                               | * $1 \times 10^{-3}$<br>14/6    |                               |                              | Embryonic development                           |
|                                 |                               | $5 \times 10^{-2}$<br>60/49     |                               |                              | Positive regulation of biological process       |
| * $4 \times 10^{-5}$<br>150/115 |                               | * $8 \times 10^{-5}$<br>94/65   |                               | $4 \times 10^{-2}$<br>32/23  | Transcription factor activity                   |
| * $1 \times 10^{-4}$<br>628/561 | $6 \times 10^{-3}$<br>276/242 | $1 \times 10^{-2}$<br>352/319   | $6 \times 10^{-3}$<br>154/128 |                              | Protein binding                                 |
| * $4 \times 10^{-4}$<br>63/44   |                               | $7 \times 10^{-3}$<br>37/25     |                               |                              | Transcription cofactor activity                 |
| $2 \times 10^{-3}$<br>17/9      |                               |                                 |                               |                              | Kinase regulator activity                       |
| $4 \times 10^{-3}$<br>51/37     |                               | $4 \times 10^{-3}$<br>33/21     |                               |                              | Transcriptional activator activity              |
| $6 \times 10^{-3}$<br>35/24     | $5 \times 10^{-2}$<br>16/10   |                                 |                               |                              | Transcriptional repressor activity              |
| $9 \times 10^{-3}$<br>10/5      |                               |                                 |                               |                              | Small protein conjugating enzyme activity       |
| $2 \times 10^{-2}$              | $3 \times 10^{-2}$            |                                 |                               |                              | RNA polymerase II transcription factor activity |

|                             |                               |                               |                            |  |                                     |
|-----------------------------|-------------------------------|-------------------------------|----------------------------|--|-------------------------------------|
| 46/35                       | 23/15                         |                               |                            |  |                                     |
| $4 \times 10^{-2}$<br>25/18 |                               | $4 \times 10^{-2}$<br>16/10   |                            |  | Receptor signaling protein activity |
|                             | $7 \times 10^{-3}$<br>11/5    |                               |                            |  | Pattern binding                     |
|                             | $2 \times 10^{-2}$<br>31/22   |                               |                            |  | Ligase activity                     |
|                             | $2 \times 10^{-2}$<br>135/115 |                               |                            |  | Nucleotide binding                  |
|                             |                               |                               | $3 \times 10^{-2}$<br>10/5 |  | Carbohydrate binding                |
|                             |                               |                               | $4 \times 10^{-2}$<br>12/7 |  | Enzyme activator activity           |
| $3 \times 10^{-2}$<br>24/17 |                               |                               |                            |  | Transcription factor complex        |
|                             |                               | $2 \times 10^{-2}$<br>312/283 |                            |  | Membrane                            |

Supplementary Table 2: GoMiner Gene Ontology false discovery rate results for biological process (first section), molecular function (second section), cellular component (third section). The maximum FDR was set at the 0.10 level; blank cells did not meet this significance. Entirely blank rows are those categories detected by the hypergeometric test (Supplementary Table 1) but which were below the FDR threshold; categories in *italic* are those not deemed significant by the hypergeometric test.

| Targeted genes | Diff. targ. genes | Non-diff. targ. genes | On/off genes | Modulating genes | Name                                                       |
|----------------|-------------------|-----------------------|--------------|------------------|------------------------------------------------------------|
| 0.0000         | 0.0000            | 0.0000                |              | 0.0000           | Regulation of cellular process                             |
| 0.0000         |                   | 0.0455                |              |                  | Cell differentiation                                       |
| 0.0000         | 0.0235            |                       |              |                  | Negative regulation of biological process                  |
| 0.0000         | 0.0683            | 0.0000                |              |                  | Cell communication                                         |
| 0.0000         | 0.0000            | 0.0483                |              | 0.0333           | Regulation of physiological process                        |
| 0.0000         |                   | 0.0125                |              |                  | System development                                         |
|                |                   |                       |              |                  | Vesicle-mediated transport                                 |
|                |                   |                       |              |                  | Cell migration                                             |
| 0.0873         |                   |                       |              |                  | Organ development                                          |
| 0.0444         |                   |                       |              |                  | Cell growth                                                |
|                | 0.0467            |                       | 0.0900       |                  | Locomotion                                                 |
| 0.0213         |                   | 0.0579                |              |                  | Embryonic development                                      |
|                |                   |                       |              |                  | Positive regulation of biological process                  |
| 0.0714         |                   | 0.0595                |              |                  | <i>Segmentation</i>                                        |
| 0.0860         |                   |                       |              |                  | <i>Cell adhesion</i>                                       |
| 0.0872         |                   |                       |              |                  | <i>Morphogenesis</i>                                       |
| 0.0881         |                   | 0.0605                |              |                  | <i>Pattern specification</i>                               |
|                | 0.0560            |                       |              |                  | <i>Viral infectious cycle</i>                              |
| 0.0000         | 0.0000            | 0.0000                |              |                  | Transcription factor activity                              |
| 0.0000         |                   | 0.0385                |              | 0.0444           | Protein binding                                            |
| 0.0085         |                   | 0.0585                |              |                  | Transcription cofactor activity                            |
| 0.0098         |                   |                       |              |                  | Kinase regulator activity                                  |
| 0.0341         |                   | 0.0939                |              |                  | Transcriptional activator activity                         |
| 0.0074         |                   |                       |              |                  | Transcriptional repressor activity                         |
| 0.0313         | 0.0364            |                       |              |                  | Small protein conjugating enzyme activity                  |
| 0.0459         |                   |                       |              |                  | RNA polymerase II transcription factor activity            |
| 0.0357         |                   | 0.1000                |              |                  | Receptor signaling protein activity                        |
|                |                   |                       | 0.0800       |                  | Pattern binding                                            |
|                |                   |                       |              |                  | Ligase activity                                            |
| 0.0485         | 0.0955            |                       |              |                  | Nucleotide binding                                         |
|                |                   |                       |              |                  | Carbohydrate binding                                       |
|                |                   |                       |              |                  | Enzyme activator activity                                  |
| 0.1000         |                   |                       |              |                  | <i>Phosphatase regulator activity</i>                      |
|                |                   |                       |              |                  | Transcription factor complex                               |
|                |                   |                       |              |                  | Membrane                                                   |
| 0.0329         |                   |                       |              |                  | <i>Eukaryotic translation initiation factor 4F complex</i> |
| 0.0714         |                   |                       |              |                  | <i>cAMP-dependent protein kinase complex</i>               |
